# Supplementary material
Source: Springer Nature journal article supplement (https://www.springermedizin.de/resource/supplementary/12885_2012_4027_MOESM18_ESM.pdf/9465002)

# Carmine Alum Whole Mount

10wk-EGFP ms

XZ

**A**

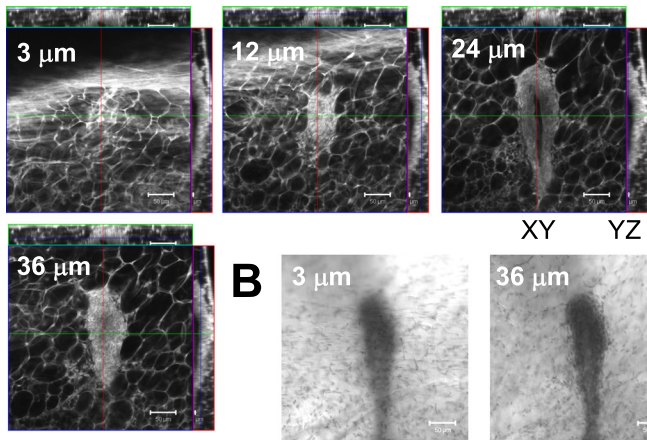

8wk-EGFP ms

**C**

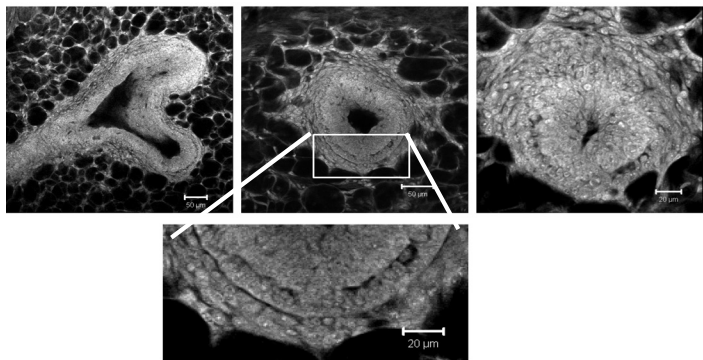

Supplement: MOESM18 [file 9465002]
